# Supplementary material
Source: publisher figshare collection journal article supplement (https://acs.figshare.com/ndownloader/files/31615041)
Supplement: Supplementary file 1 [file 31615041]

## **SUPPORTING INFORMATION**

### **Investigating the Photothermal Disinfecting Properties of Light Activated Silver Nanoparticles**

Jenna MacPhee, Tracy Kinyenye, Brian J. MacLean, Erwan Bertin,\*<sup>§</sup> Geniece L. Hallett-Tapley<sup>§</sup>

*Department of Chemistry, Saint Francis Xavier University, 5009 Chapel Square  
Antigonish, Canada B2G 2W5*

\*Corresponding Author: [ebertin@stfx.ca](mailto:ebertin@stfx.ca)

<sup>§</sup> Both authors contributed equally

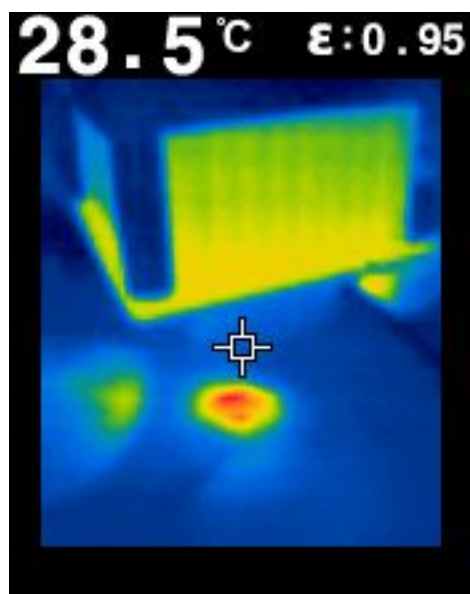

Figure S1: Temperature measurement on the labcoat, uncoated, at 3 cm, illuminated with 7 LEDs. Note the lab coat is the lower circular area, whereas the square one in the upper half of the image is the LED assembly.

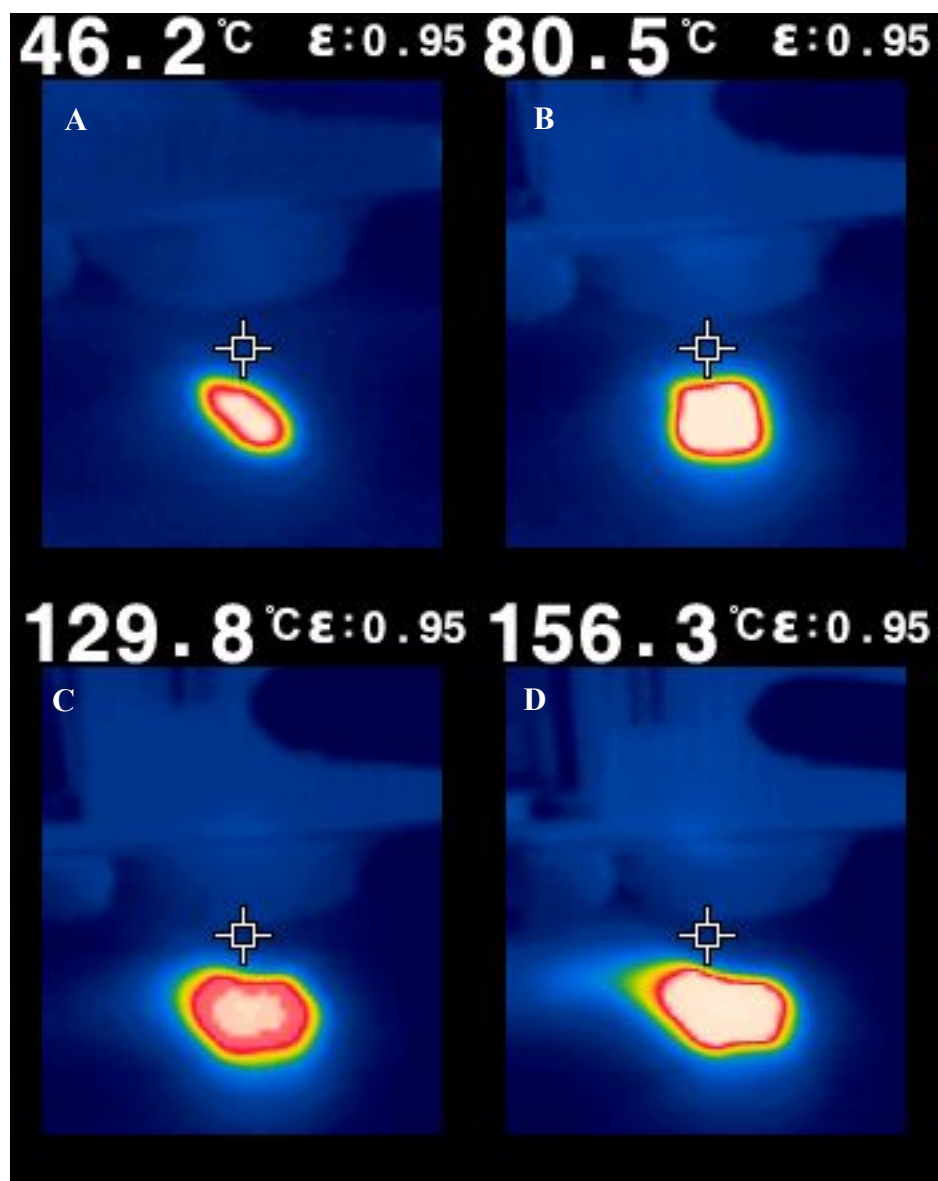

Figure S2: Representative images from the thermal camera a coated lab coat using hv AgNPs ( $5 \pm 1 \mu\text{g}/\text{cm}^2$ ) taken at 3 cm using 2 (A), 4 (B), 6 (C) and 7 (D) LEDs.

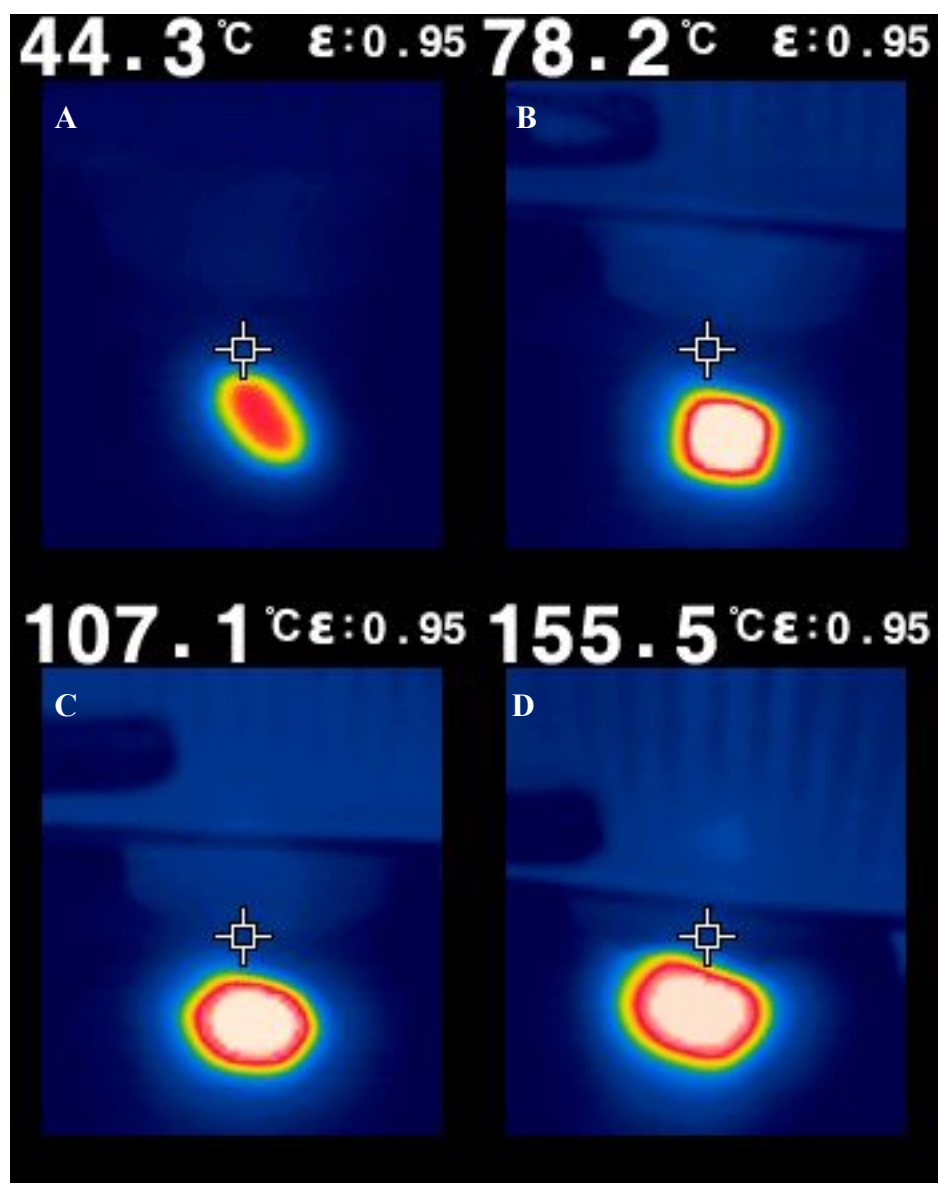

Figure S3: Representative images from the thermal camera a coated lab coat using PLAL AgNPs ( $3 \pm 1 \mu\text{g}/\text{cm}^2$ ) taken at 3 cm using 2 (A), 4 (B), 6 (C) and 7 (D) LEDs.

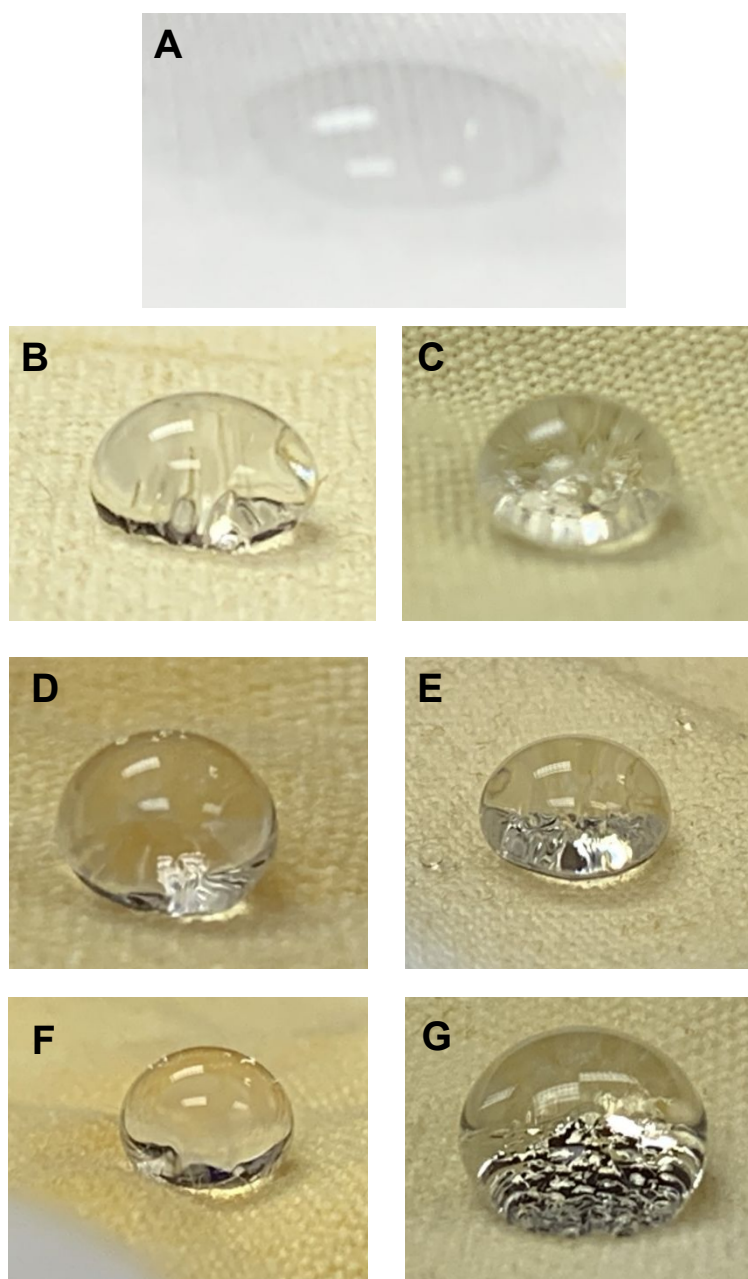

Figure S4: Wettability assessment of (A) an uncoated lab coat, (B) as prepared PLAL AgNP, (C) as prepared hv AgNP, (D) PLAL AgNP after 4 washes, (E) hv AgNP after 4 washes, (F) PLAL AgNP after 9 washes and (G) hv AgNP after 9 washes.
